# Supplementary material for: Galectin-9 has non-apoptotic cytotoxic activity toward acute myeloid leukemia independent of cytarabine resistance
Source: PubMed Central journal article supplement (PMC10322858; doi:10.1038/s41420-023-01515-w), 2023-07-06

## Western blots manuscript Choukrani et al

| Figure in paper | Sample/ protein       | blot name                           | band #        |
|-----------------|-----------------------|-------------------------------------|---------------|
| Figure 3F       | caspace 35 kDa        | Blot1_Fig3F_casp3-35kDa             | all           |
| Figure 3F       | caspace 17 kDa        | Blot2_Fig3F_casp3-17kDa             | all           |
| Figure 4H       | THP1_LC3BII           | Blot3_Fig4H_Suppl4A_LC3             | 7-10          |
| Figure 4H       | THP1_p62              | Blot4_Fig4H_THP1-p62                | all           |
| Figure 4H       | THP1_actin            | Blot5_Fig4H-THP1-actin              | 7-10          |
| Figure 4H       | patient_LC3BII        | Blot6_Fig4H-pat-LC3                 | 1-4           |
| Figure 4H       | patient_p62           | Blot7_Fig4H-pat-p62                 | 1-4           |
| Figure 4H       | patient_actin         | Blot8_Fig4H-pat-actin               | 1-4           |
| Figure 4I       | THP1-NB4_LC3BII       | Blot9_Fig4I-THP1-NB4-LC3BII         | all           |
| Figure 4I       | THP1-NB4_actin        | Blot10_Fig4I-THP1-NB4-actin         | all           |
| Figure 4I       | MOLM13_OCIAML3_LC3BII | Blot11_Fig4I-MOLM13-OCIAML3-LC3BII  | all           |
| Figure 4I       | MOLM13_OCIAML3_actin  | Blot12_Fig4I-Molm13-OciAml3-actin   | 1-6           |
| Figure 4I       | Pat1_LC3BII           | Blot13-Fig4I-patient 1-LC3          | last 2        |
| Figure 4I       | pat1_actin            | Blot14-Fig4I-patient1-actin         | last 2        |
| Figure 4I       | Pat2_LC3BII           | Blot15_Fig4I_Pat2-Pat3_LC3B         | last 2        |
| Figure 4I       | pat2_actin            | Blot16_Fig4I_Pat2-Pat3_actin        | last 2        |
| Figure 4I       | Pat3_LC3BII           | Blot15_Fig4I_Pat2-Pat3_LC3B         | first 2       |
| Figure 4I       | pat3_actin            | Blot16_Fig4I_Pat2-Pat3_actin        | first 2       |
| Figure 4I       | Pat4_LC3BII           | Blot17_Fig4I_Pat4-LC3BII            | 5,6           |
| Suppl4A         | HL60_LC3BII           | Blot3_Fig4H_Suppl4A_LC3             | 1-4           |
| Suppl4A         | MOLM13_LC3BII         | Blot18_Figsuppl4A-MOLM13-LC3        | 1-4           |
| Suppl4A         | NB4_LC3BII            | Blot19_Figsuppl4A-NB4-LC3           | 2-5           |
| Suppl4A         | U937_LC3BII           | Blot20_Figsuppl4A-u937-LC3          | 1-4           |
| Suppl4A         | Actin                 | Blot21_FigSuppl4A-Actin             | 6-9           |
| Suppl4B         | HL60-THP1_LC3BII      | Blot22_Figsuppl4B-HL60-THP1-LC3B    | 1-12          |
| Suppl4B         | HL60-THP1_actin       | Blot23_Figsuppl4B-HL60-THP1-actin   | 1-12          |
| Suppl4B         | NB4-OCIAML3_LC3BII    | Blot24_Figsuppl4B-NB4-OCIAML3-LC3B  | 1-12          |
| Suppl4B         | NB4-OCIAML3_actin     | Blot25_Figsuppl4B-NB4-OCIAML3-actin | 1-12          |
| Suppl4C         | CB_LC3BII             | Blot 26_Figsuppl4C-CB-LC3BII        | 1-2, 4-5, 7-8 |
| Suppl4C         | CB_Actin              | Blot 27_Figsuppl4C-CB-actin         | 1-2, 4-5, 7-8 |
| Suppl4H         | K562_LC3BII           | Blot28_Figsuppl4H-K562_LC3BII       | 4, 5          |
| Suppl4H         | K562_actin            | Blot29_Figsuppl4H-K562_actin        | 4, 5          |

Blot1\_Fig3F\_casp3-35kDa

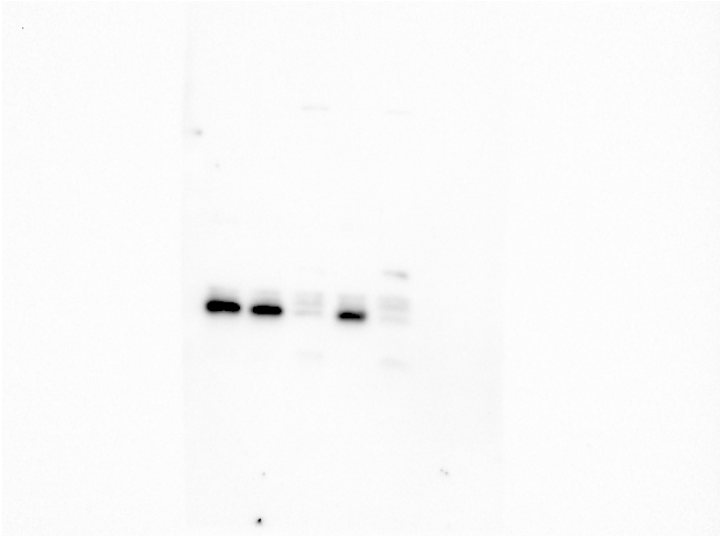

Blot 2\_Fig3F\_casp3-17kDa

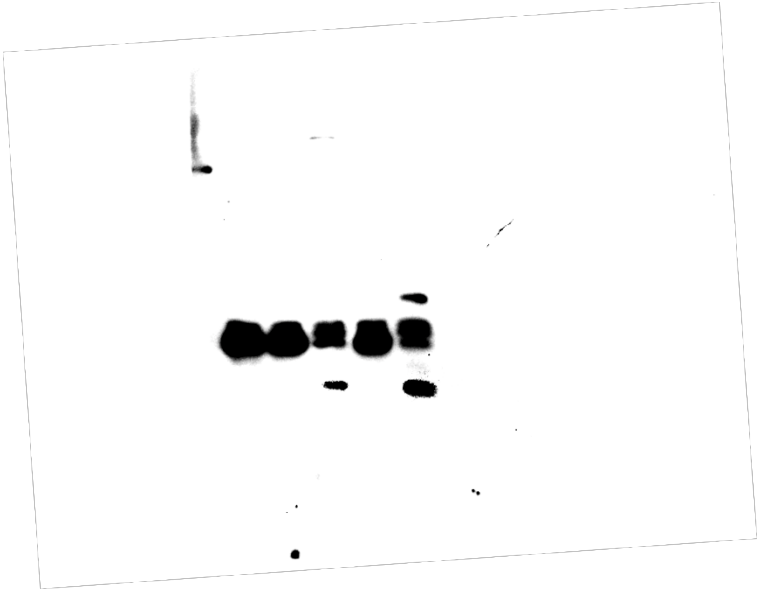

Blot3\_Fig4H\_suppl4A\_LC3

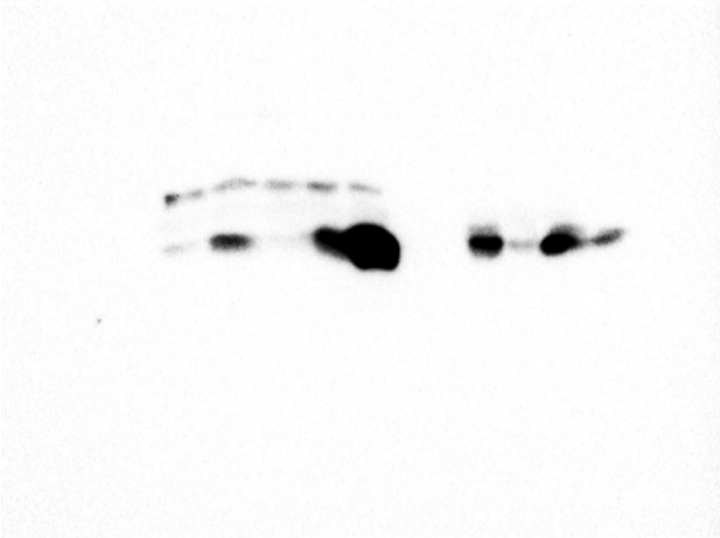

Blot4\_Fig4H\_THP1-p62

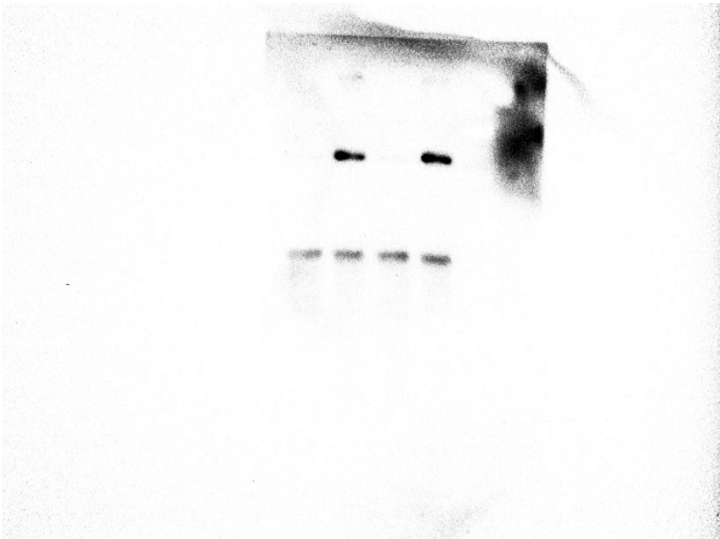

Blot5\_Fig4H-THP1-actin

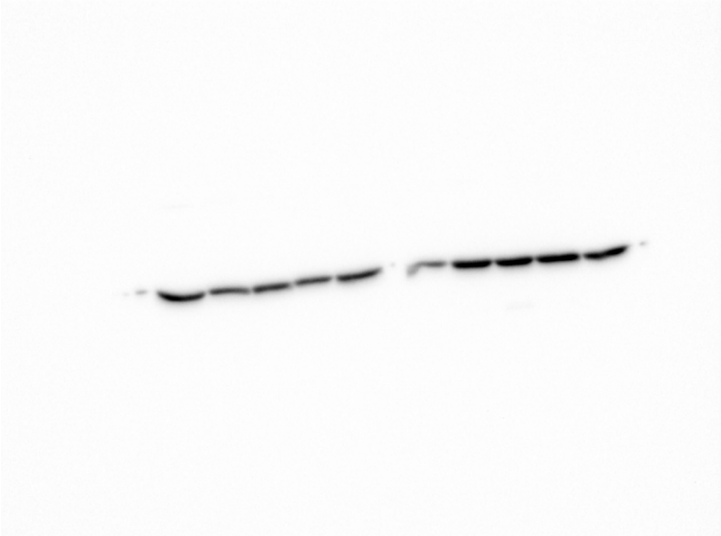

Blot6\_Fig4H-pat-LC3

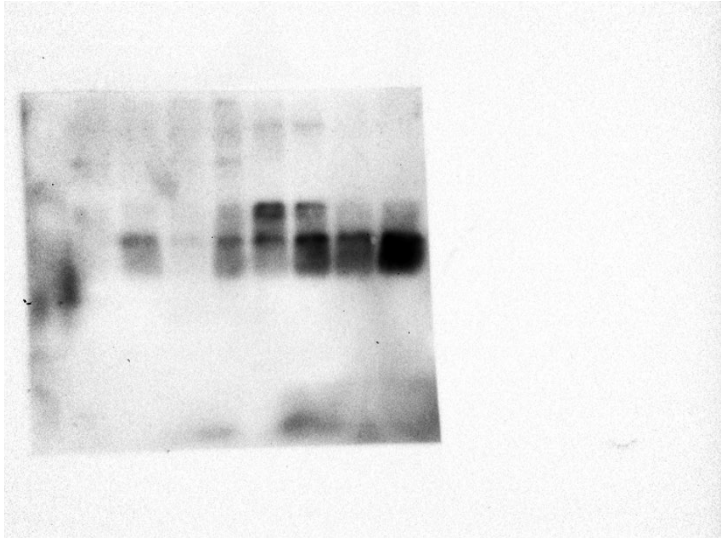

Blot7-Fig4H-pat-62

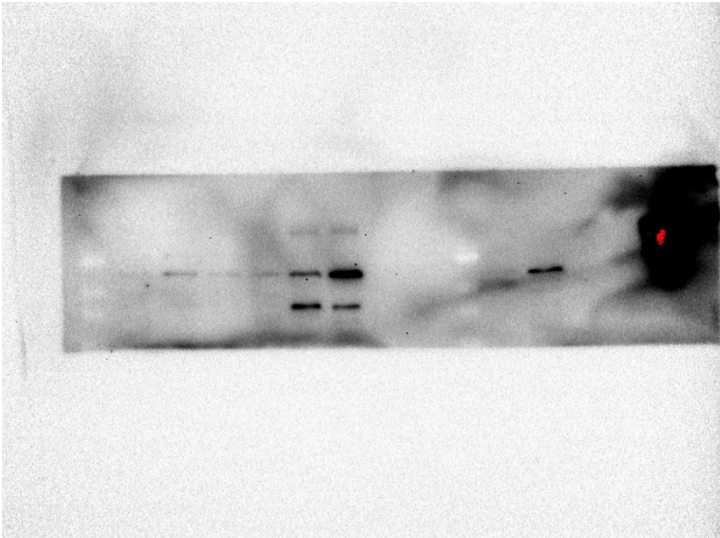

Blot8\_Fig4H-pat-actin

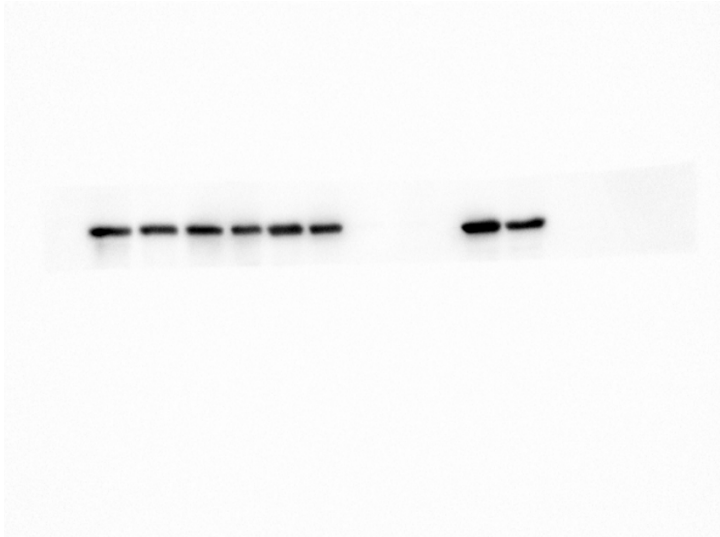

Blot9\_Fig4I-THP1-NB4-LC3BII

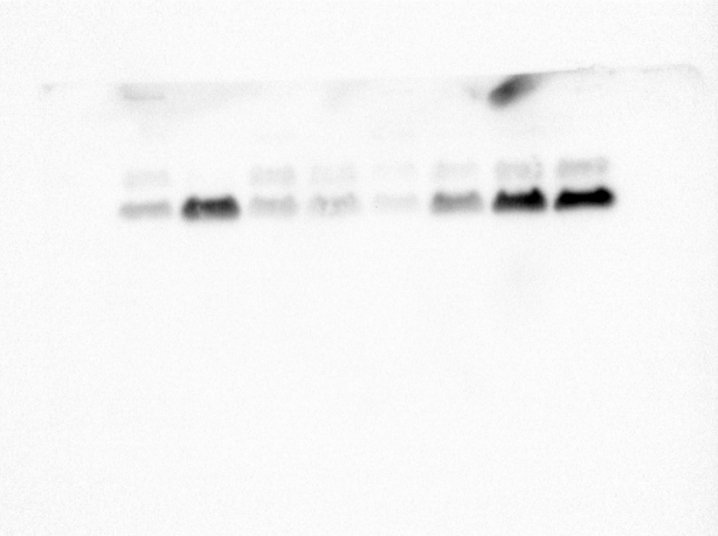

Blot10\_Fig4I-THP1-NB4-actin

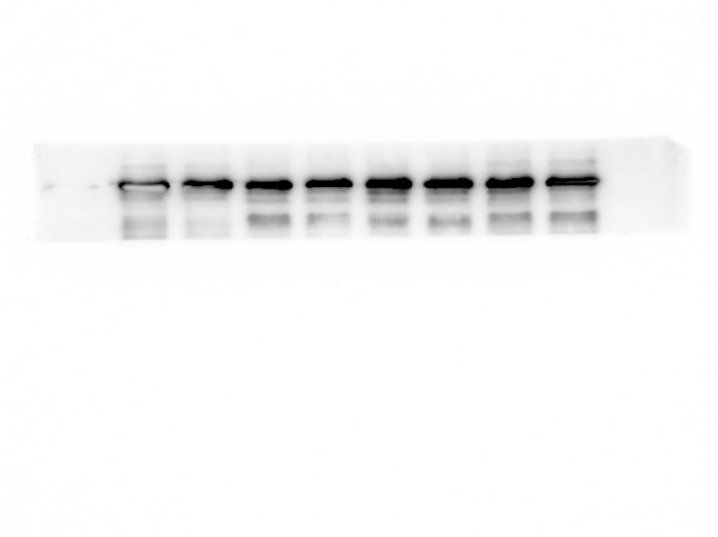

Blot11\_Fig4I-MOLM13-OCIAML3-LC3BII

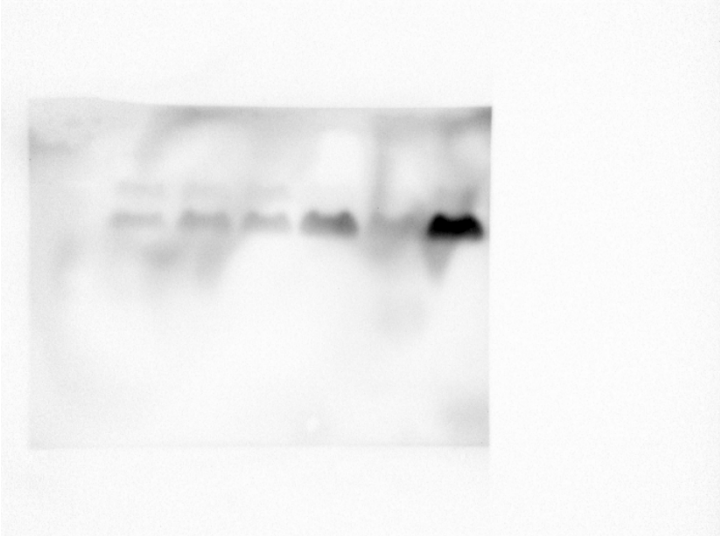

Blot12\_Fig4I-Molm13-OciAML3-actin

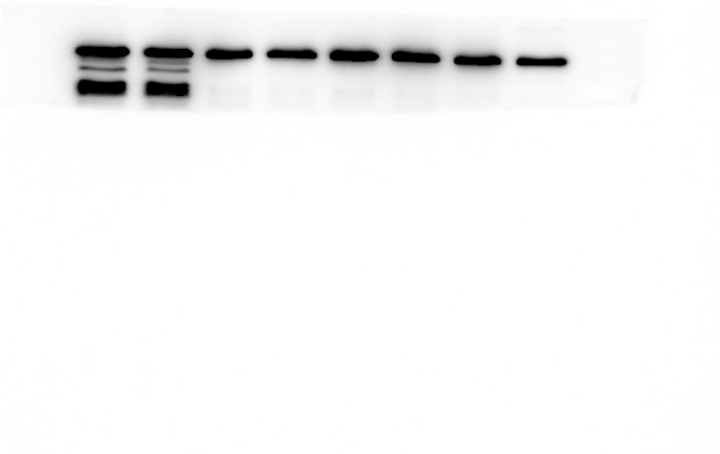

Blot13-Fig4I-patient1-LC3

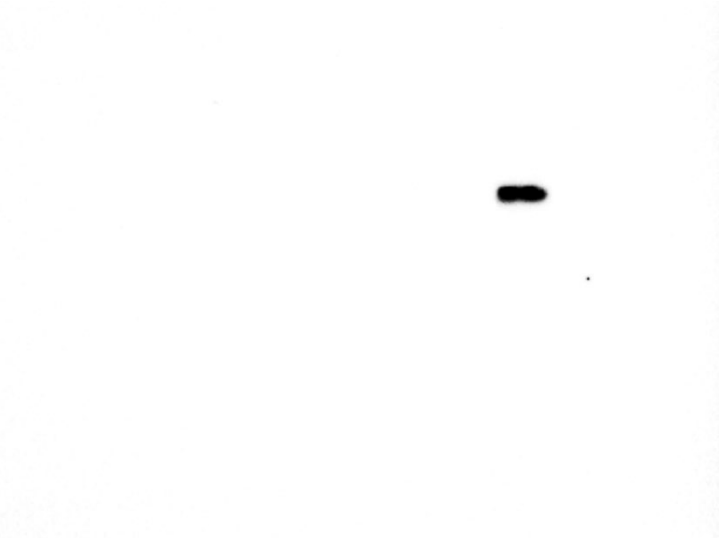

Blot14-Fig4I-patient1-actin

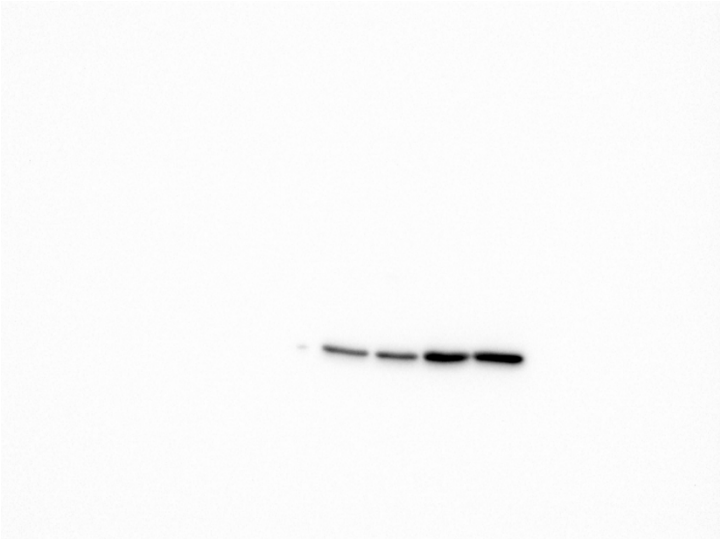



Blot15\_Fig4I-Pat2-Pat3\_LC3B

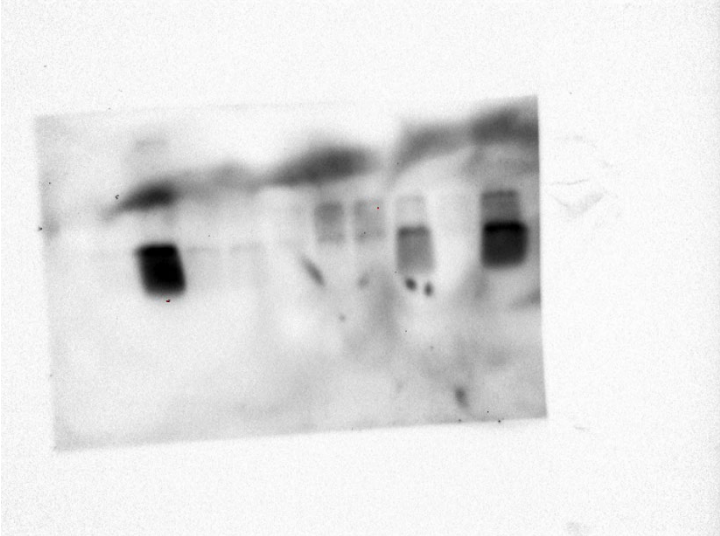

Blot16\_Fig4I\_Pat2-Pat3\_actin

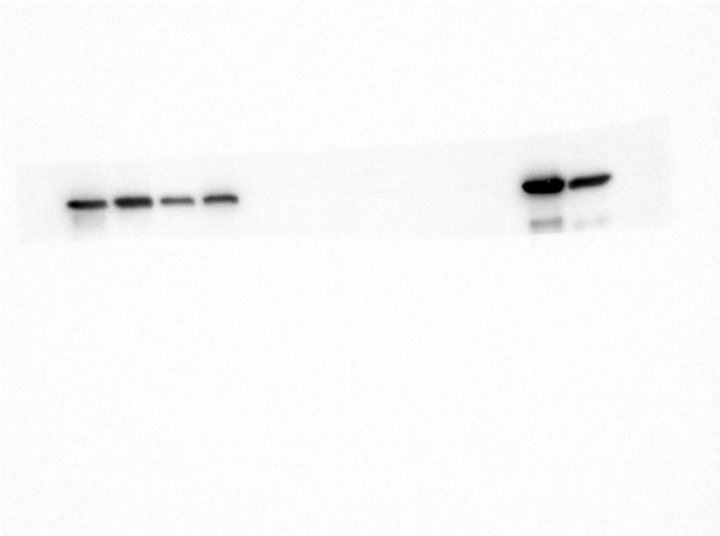

Blot17\_Fig4I\_Pat4-LC3BII

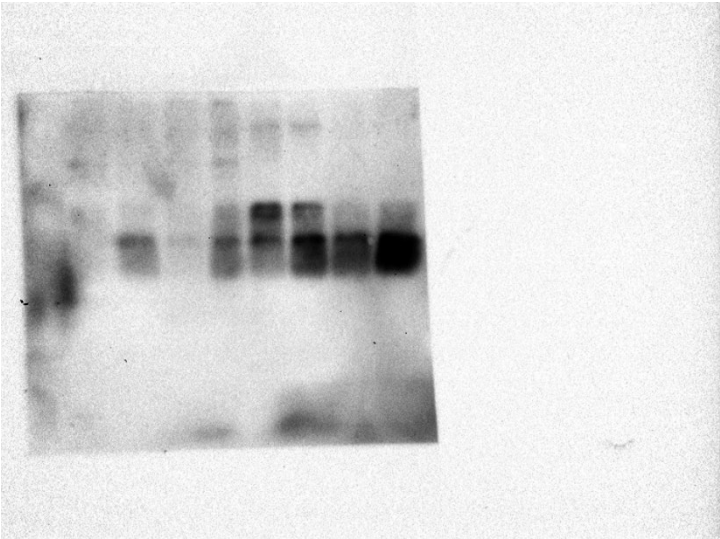

Blot18\_Figsuppl4A-MOLM13-LC3

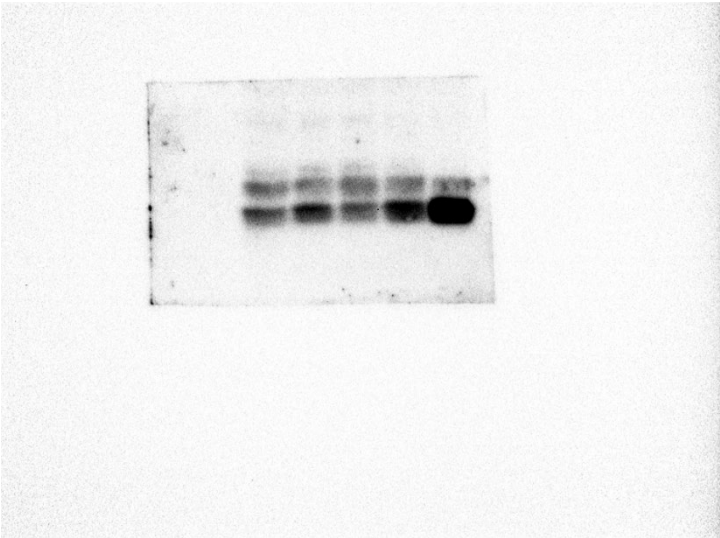

Blot19-Figsuppl4A-NB4-LC3

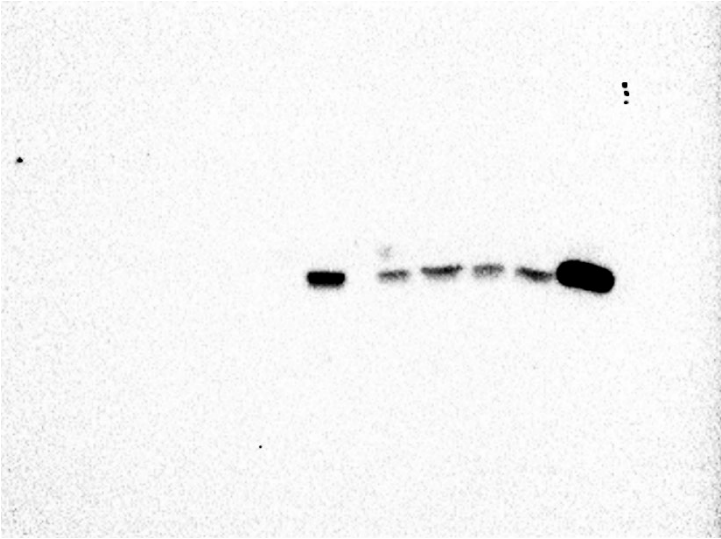

Blot20\_Figsuppl4A-U937-LC3

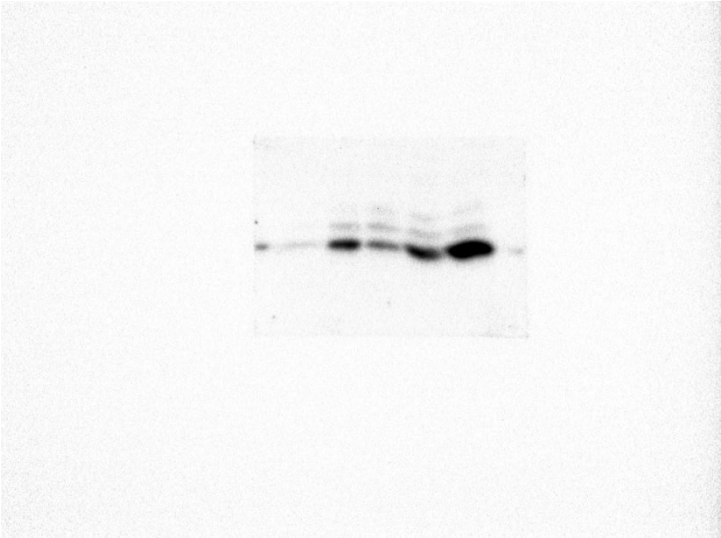

Blot21\_FigSuppl4A-Actin

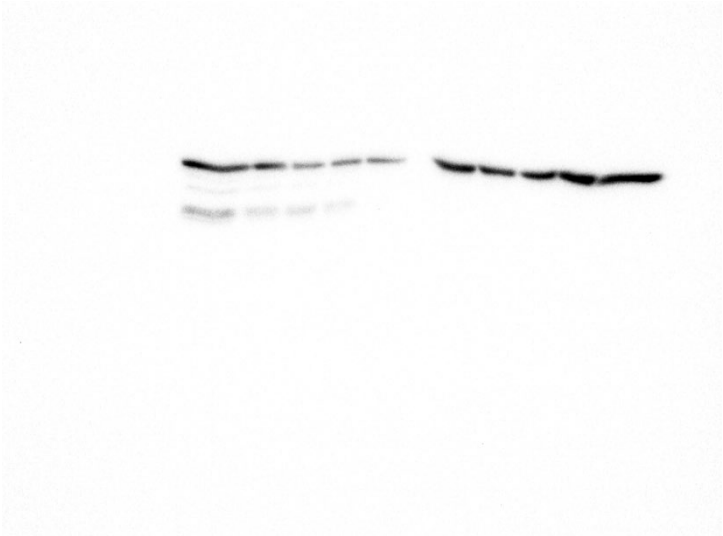

Blot22\_Figsuppl4B-HL60-THP1-LC3B

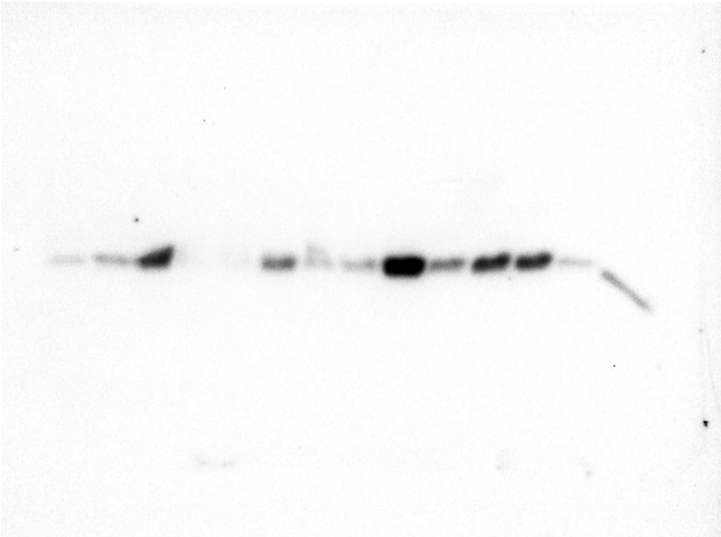

Blot23\_Figsuppl4B-HL60-THP1-actin

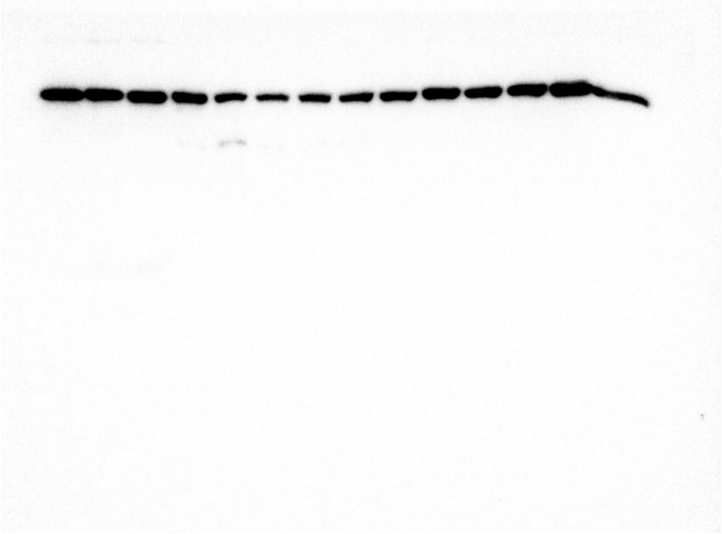

Blot24\_Figsuppl4B-NB4-OCIAML3-LC3B

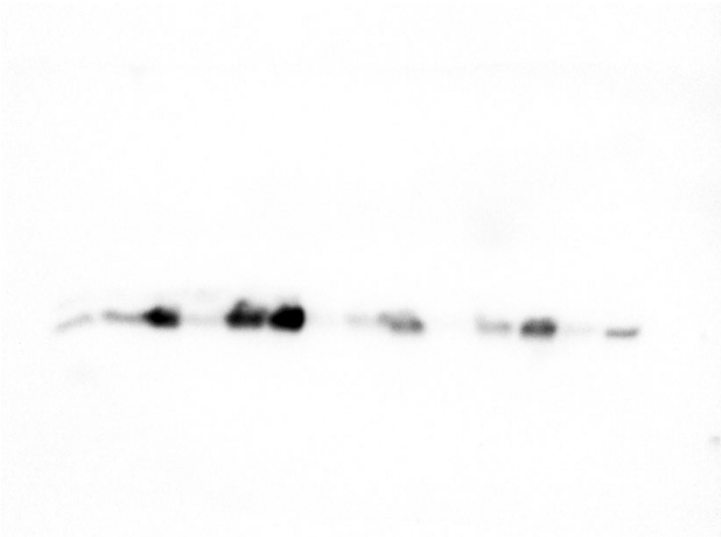

Blot25\_Figsuppl4B-NB4-OCIAML3-actin

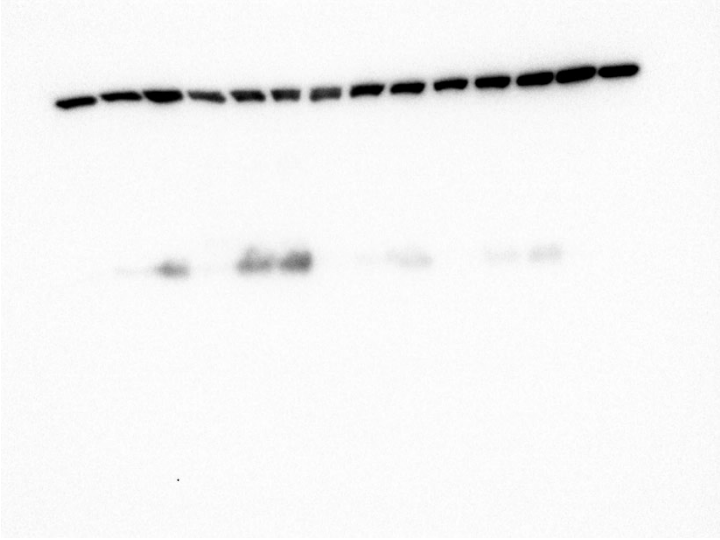

Blot 26\_Figsuppl4C-CB-LC3BII

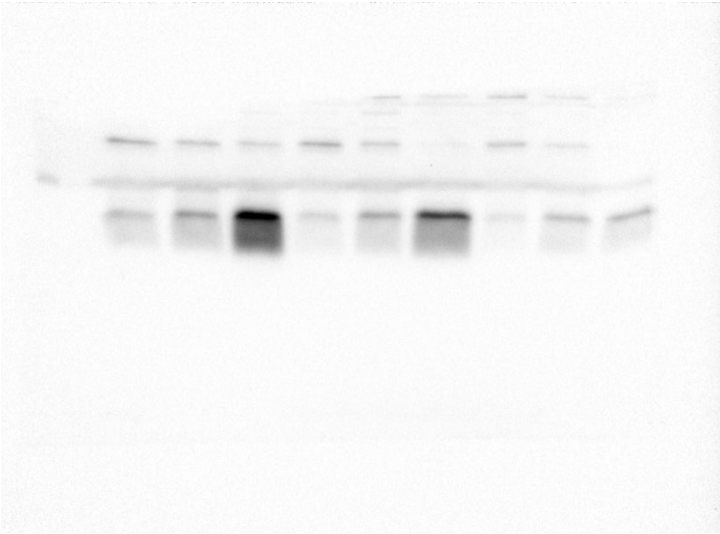

Blot 27\_Figsuppl4C-CB-actin

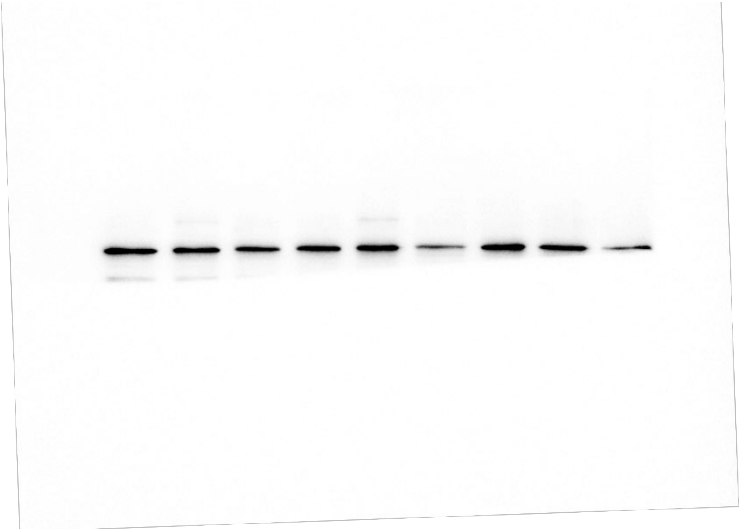



Blot28\_Figsuppl4H-K562\_LC3BII

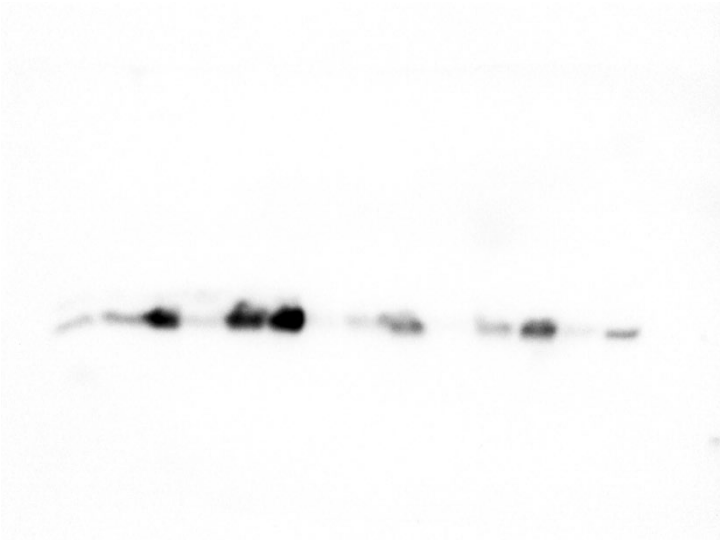

Blot29\_Figsuppl4H-K562\_actin

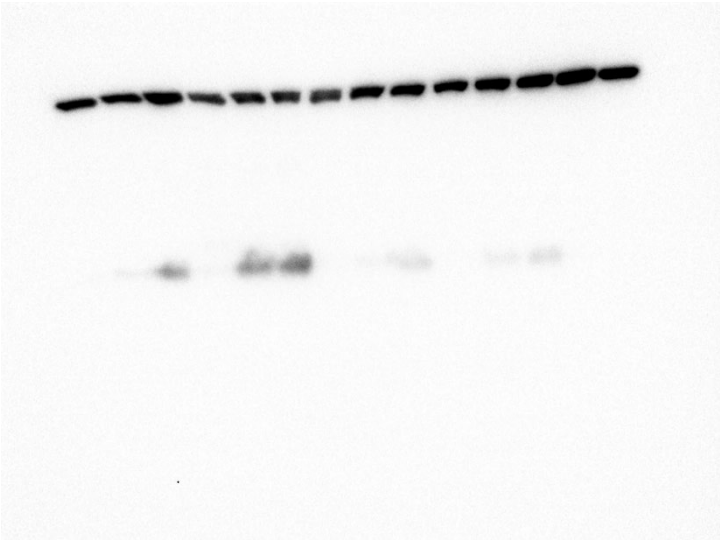

Supplement: 41420_2023_1515_MOESM8_ESM.pdf [file 41420_2023_1515_MOESM8_ESM.pdf]
