# Supplementary material for: Galectin-9 has non-apoptotic cytotoxic activity toward acute myeloid leukemia independent of cytarabine resistance
Source: PubMed Central journal article supplement (PMC10322858; doi:10.1038/s41420-023-01515-w), 2023-07-06
Supplement: 41420_2023_1515_MOESM2_ESM.pdf [file 41420_2023_1515_MOESM2_ESM.pdf]

Suppl Figure 1

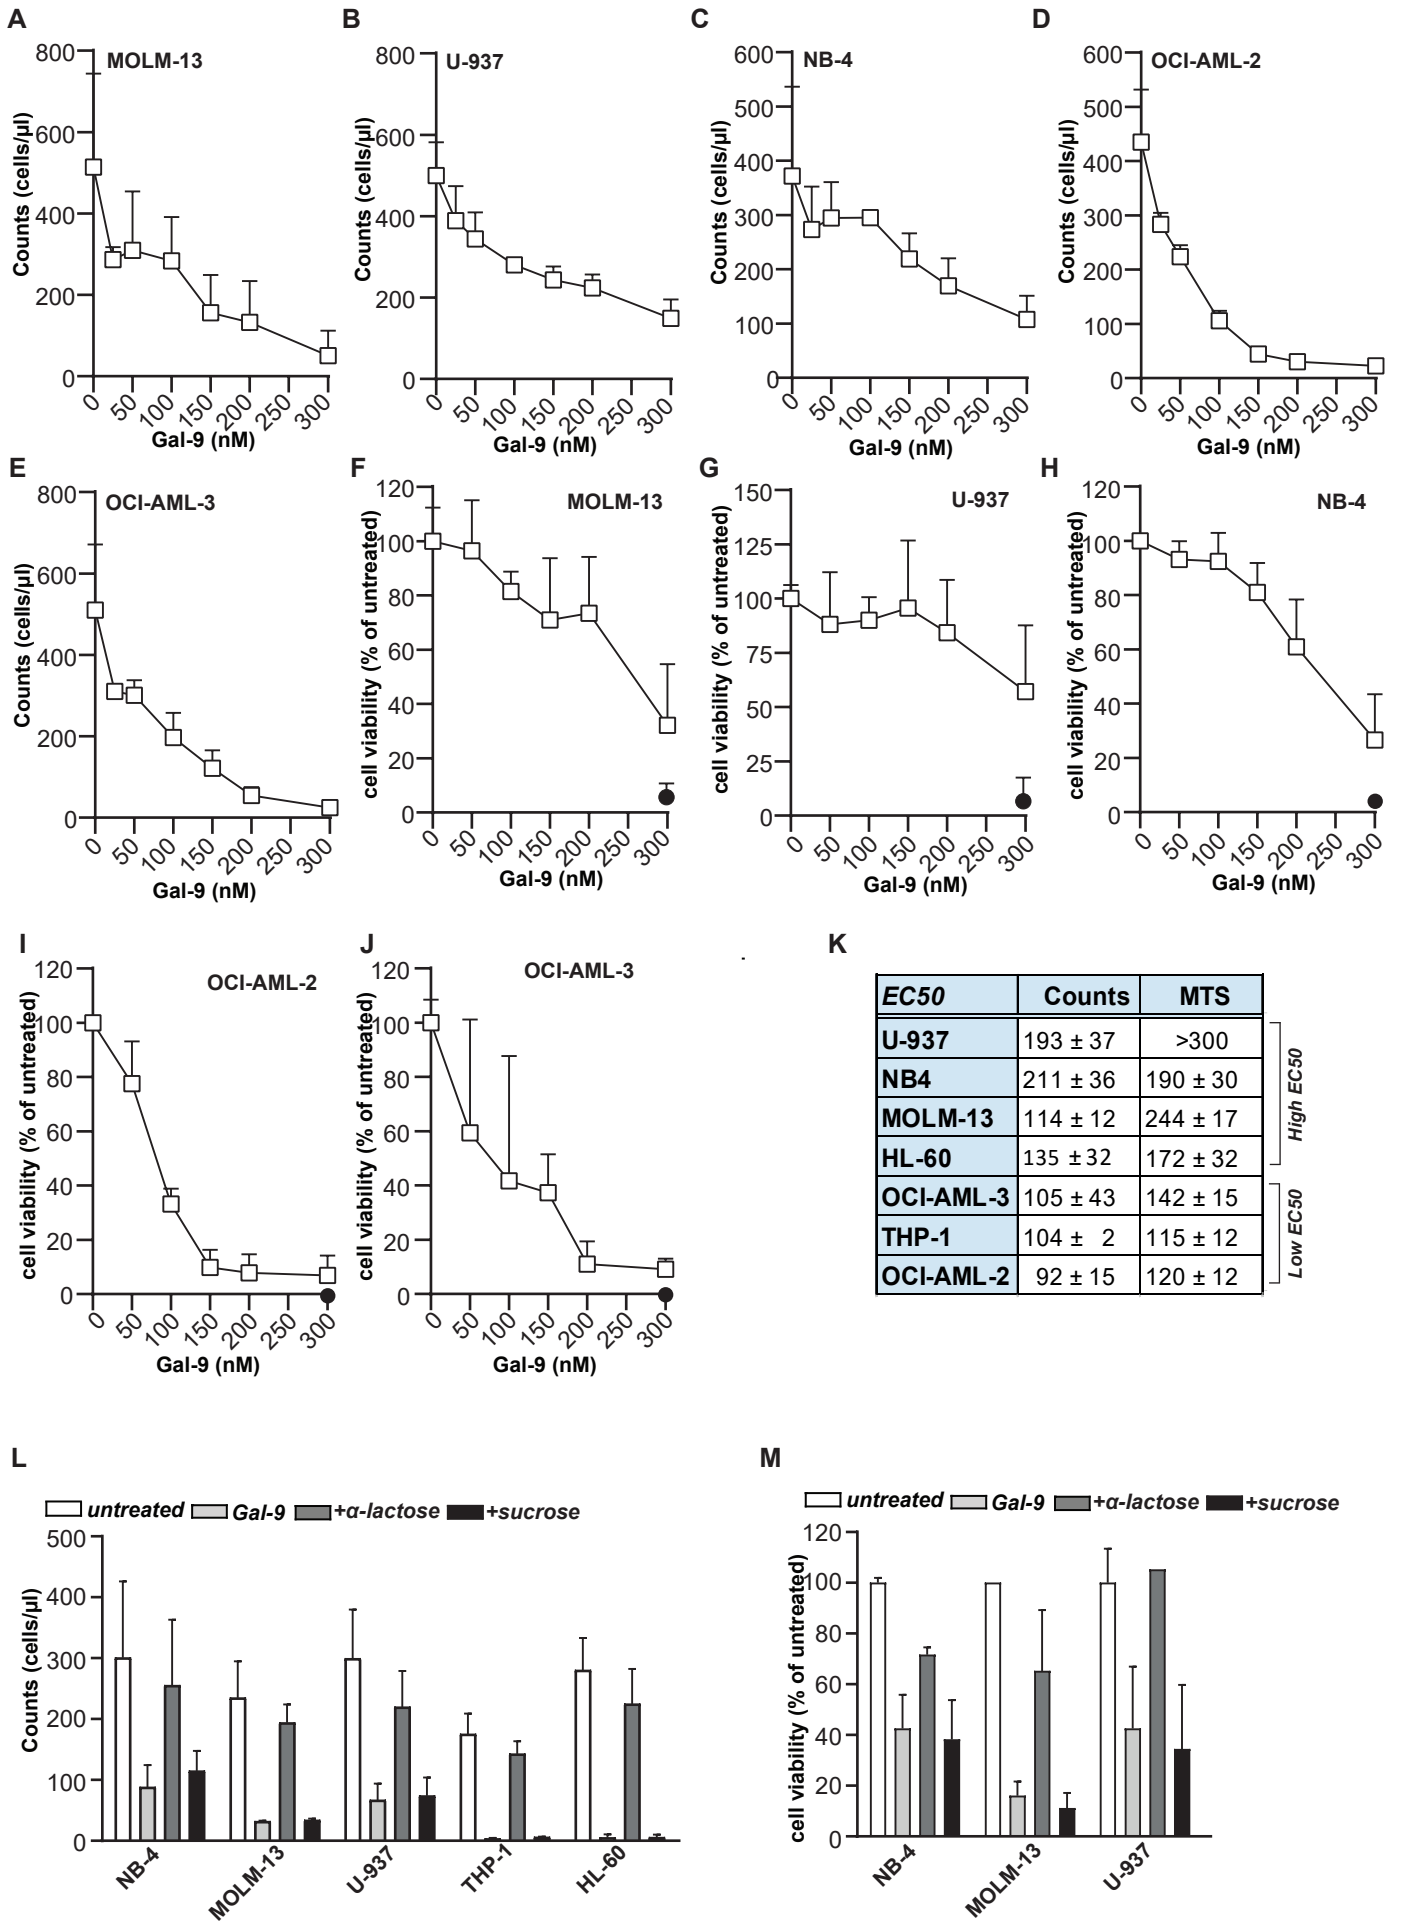

● = 600nM
