# Supplementary material for: Galectin-9 has non-apoptotic cytotoxic activity toward acute myeloid leukemia independent of cytarabine resistance
Source: PubMed Central journal article supplement (PMC10322858; doi:10.1038/s41420-023-01515-w), 2023-07-06
Supplement: 41420_2023_1515_MOESM7_ESM.pdf [file 41420_2023_1515_MOESM7_ESM.pdf]

Suppl Table 1

| AML | Age | karyotype                                   | WBC   | Risk (ELN17) | FLT3-ITD | EVI1 overexpressie | NPM1 | NGS                                                 | <i>in vitro</i>          |                |
|-----|-----|---------------------------------------------|-------|--------------|----------|--------------------|------|-----------------------------------------------------|--------------------------|----------------|
| 1   | 65  | 45,XY,-7                                    | 54,2  | Adverse      | none     | none               | none | EZH2 (0.89), RUNX1 (0.63), IDH2 (0.46)              | CD34+ treated with Gal-9 |                |
| 2   | 65  | 46,XX,t(11;19)(q23;p13.1)                   | 52,7  | Adverse      | none     | mut                | none | ND                                                  |                          |                |
| 3   | 68  | 47,XY,+11                                   | 47    | Intermediate | none     | none               | none | ND                                                  |                          |                |
| 4   | 60  | 46,XY,t(7;11)                               | 125,2 | Adverse      | none     | none               | none | ND                                                  |                          |                |
| 5   | 33  | NK                                          | 48,9  | Adverse      | ITD      | none               | none | ND                                                  |                          |                |
| 6   | 78  | NK                                          | 135,4 | Adverse      | ITD      | none               | none | NRAS (0.13), FLT3 (0.23), IDH2 (0.48), SRSF2 (0.63) | CD34- treated with Gal-9 |                |
| 7   | 34  | 45,X,-Y                                     | 234,7 | Intermediate | ITD      | none               | mut  | ND                                                  |                          |                |
| 8   | 69  | NK                                          | 183,8 | Favorable    | none     | none               | mut  | NPM1 (0.36), FLT3 (0.36), IDH2 (0.40), STAG2 (0.95) |                          |                |
| 9   | 31  | 46,XY,t(9;11)(p22;q23)                      | 14,4  | Adverse      | none     | mut                | none | ND                                                  |                          |                |
| 10  | 75  | NK                                          | 6,6   | Favorable    | none     | none               | mut  | ND                                                  |                          |                |
| 11  | 46  | 46,Y,t(X;12)(p11.2;q13),t(11;19)(q23;p13.3) | 55,4  | Adverse      | none     | none               | none | ND                                                  |                          |                |
| 12  | 43  | NK                                          | 23    | Favorable    | none     | none               | mut  | ND                                                  |                          |                |
| 13  | 73  | NK                                          | 66,7  | intermediate | none     | none               | none | ND                                                  | AraC Non-responders      |                |
| 14  | 73  | NK                                          | 89,3  | intermediate | ITD      | none               | mut  | ND                                                  |                          |                |
| 15  | 68  | 46,XY,t(11;22)(q23;q13)                     | 100,6 | Adverse      | none     | none               | none | SRSF2 (0.39), TET2 (0.16)                           |                          |                |
| 16  | 48  | NK                                          | 11,7  | ND           | ND       | ND                 | ND   | ND                                                  | AraC Responders          |                |
| 17  | 48  | NK                                          | 11,7  | ND           | ND       | ND                 | ND   | ND                                                  |                          |                |
| 18  | 69  | NK                                          | 10,8  | intermediate | none     | none               | none | SRSF2 (0.56), ASXL1 (0.06)                          |                          |                |
| 19  | 61  | NK                                          | 10,7  | intermediate | ITD      | none               | mut  | DNMT3A (0.47), NPM1 (0.38), FLT3 (0.32)             |                          |                |
| 20  | 41  | NK                                          | 23    | Adverse      | ITD      | none               | none | ND                                                  |                          |                |
| 21  | 71  | NK                                          | 6,5   | Favourable   | none     | none               | none | ND                                                  |                          | <i>Denovo</i>  |
| 22  | 71  |                                             |       |              |          |                    |      | ND                                                  |                          | <i>Relapse</i> |
